# Supplementary material
Source: publisher figshare collection journal article supplement (https://springernature.figshare.com/ndownloader/files/13459214)
Supplement: Supplementary file [file 13459214]

### **Additional file 1:** Search strategy

Database: PubMed

(utilization [TIAB] OR utilisation [TIAB] OR usage [TIAB] OR uptake [TIAB] OR use\* [TIAB] OR medication use [TIAB] OR drug use [TIAB] OR medicine use [TIAB] OR coverage [TIAB] OR access\* [TIAB] OR health care [TIAB] OR healthcare [TIAB] OR health service\* [TIAB] OR medical care [TIAB])

AND (migrat\* [TIAB] OR migrant\* [TIAB] OR immigrant\* [TIAB] OR ethnicity [TIAB] OR race [TIAB] OR citizenship [TIAB] OR foreigner\* [TIAB] OR foreign born [TIAB] OR foreign population [TIAB] OR nationality [TIAB] OR immigration [TIAB] OR asylum seeker\* [TIAB] OR refugee\* [TIAB] OR country of origin [TIAB])

AND (german\* [TIAB] OR german [language])
